# Supplementary material
Source: HighWire-hosted journal article supplement (doi:10.1101/rna.055996.116)
Supplement: Supplemental_Information.docx [file Supplemental_Information.docx]

**SUPPLEMENTARY INFORMATION**

**SUPPLEMENTARY MATERIAL AND METHODS**

**Immunostaining**

Testes were dissected in Grace’s medium and fixed for 5 min at room temperature in a fixation solution composed of 2 parts of Grace’s medium and 1 part of 16% paraformaldehyde (Electron Microscopy Science). After several washes with PBX (PBS containing 0.2% Triton X-100), the fixed samples were pre-adsorbed in PBX containing 5% normal goat serum for at least 30 min at room temperature. The samples were incubated with the primary antibodies diluted in PBX containing 0.5% (w/v) bovine serum albumin (BSA) overnight at 4°C. After several washes in PBX, the samples were incubated in secondary antibodies diluted in PBX containing 0.5% (w/v) BSA for 4 hr at room temperature. The samples were again washed in PBX and stained with 4',6-diamidino-2-phenylindole (DAPI). Following two rinses with PBS, the samples were mounted in Vectashield (Vector Laboratories).

**Small RNA sequencing and analyses**

TotalRNAs were extracted from hand-dissected testes using the miRNeasy Mini Kit (Qiagen) in accordance with the manufacturer’s instruction. Quality of the purified RNA was checked by NanoDrop spectrophotometer and Agilent Bioanalyzer RNA 6000 chip prior to library construction. Adapters were ligated and small population (18 -29nt) were purified for subsequent library construction. Libraries were sequenced on Illumina HiSeq 2000 on a 50 cycle Single End Read sequencing run. Sequencing of *y w*, *bam*, *bgcn*, *can* and *sa* libraries at Macrogen Inc. (Seoul, Korea) was performed with one library per lane. Sequencing of *ago3t2 /t3*, *ago3t2 / TM6*, *aubN11/ HN2* and *aubN11/ CyO* libraries at the University of Utah (Salt Lake City, USA) was performed in multiplex with 2 libraries per lane using barcodes. The libraries were mapped to *Drosophila* genome (Rel 5, excluding Uextra) without any mismatches. The *bam* and *bgcn* samples representing spermatogonia and the *can* and *sa* samples representing primary spermatocytes have cells in different stages of testicular development, and the cell numbers differ among the samples as well. Such samples could have distinct expression patterns of different class of small RNAs, prompting us to avoid using any of those to normalize libraries. Hence we decided to use relative log expression (RLE), a predominantly statistical method, to normalize the small RNA libraries, without assuming that certain class of small RNAs remained unchanged among samples. We used DE-Seq2 package to normalize data by RLE method (Table S1; Love et al. 2014). In addition, we examined normalization using sequencing depth, and Rfam RNAs. Rfam database represents a broad range of small RNAs which can be classified into three functional classes: non-coding RNAs, structured cis-regulatory elements and self-splicing RNAs (Burge et al. 2013). Normalization with RLE and Rfam were in agreement for spermatogonia (*bam*, *bgcn*) and primary spermatocyte samples (*can*, *sa*) samples. We decided to use RLE normalization to compare the the *bam, bgcn, can, sa* and *y w* small RNAlibraries. We also used normalization by RLE mehod to normalize the small RNA libraries prepared from *aub* and *ago3* heterozygous and mutant testes (Table S1).

To analyze piRNA matching to clusters, only 23-29-nt reads that uniquely mapped to genome were considered (cluster information was taken from (Brennecke et al. 2007) ). The libraries were mapped to canonical transposons (obtained from flybase) allowing two mismatches. The ping-pong ratios were calculated by dividing the numbers of piRNAs with 10-nt overlap between sense piRNA with A at 10th position and antisense piRNA with U at 1st position, by the total number of piRNAs. We performed principal component analysis and Kolmogorov-Smirnoff test on R for transposon-mapping piRNAs to examine congruence between the samples representing spermatogonia (*bam* and *bgcn*) and primary spermatocytes (*can* and *sa*). The ping-pong z-scores were calculated by the probability of a 10-nt overlap minus average of probability of other overlaps (2–9, 11–20-nt overlap) divided by its standard deviation of the probability of other overlaps.

**SUPPLEMENTARY FIGURE LEGENDS**

**Fig. S1.** Germline cells are arrested at distinct stages in developmentally-arrested mutant testes. (A) *y w*, *bam* and *bgcn* testes immunostained for fusome component, Hts (green). In *y w*, *bam* and *bgcn*, branching fusomes are discernible. Spermatogonia with intense DAPI staining are accumulated in *bam* and *bgcn* mutant testes, but not in the control *y w* testes where germline cells initiate meiosis and differentiate into spermatocytes. (B) qRT-PCR of the male fertility genes, *kl-5* and *kl-3* and *ory*, showing fold-change of expression levels in mutant testes relative to that of *y w*. Error bars represent the standard deviation calculated from three biological replicates. In *bam* and *bgcn* testes where meiosis and further differentiation do not take place cells, only trace amount of the fertility genes is detected. (C) *y w*, *can* and *sa* testes immunostained for the primary spermatocyte marker, S5. In *y w* testes, S5 staining can be observed only in the apical region. By contrast, S5 staining can be seen from the apical to distal ends of *can* and *sa* testes. The asterisks denote the hub. Scale bars in A and C represent 50 µm.

**Fig. S2.** *Stellate* and transposable elements are properly repressed in the developmental arrest mutants.(A) *y w*, *aub*, *bam*, *bgcn*, *can* and *sa* testes immunostained for Ste (green) and a nuclear envelope marker, Lamin (Lam) (red). In the control *y w* and the arrested mutants, *bam*, *bgcn*, *can* and *sa* testes, no Ste staining was detected. By contrast, robust Ste staining was detected in primary spermatocytes of the piRNA pathway mutant, *aub*. The asterisks denote the hub. Scale bars represent 50 µm. (B) qRT-PCR of *1360* and *mdg3* transposon transcripts showing fold-change of expression levels in mutant testes relative to that in *y w*. Error bars represent the standard deviation of the three biological replicates. In the developmentally-arrested mutant testes, up-regulation of *1360* nor *mgd3* was detected

**Fig. S3.** The localization of Aub and Ago3 is not affected in the developmentally-arrested mutants.*bam*, *bgcn*, *can* and *sa* testes were immunostained for Ago3 (green) and Aub (red). Apical and distal refer to the apical and distal ends of each testis, respectively. The apical views show the GPC, and the distal views show the last stages observed in each mutants: spermatogonia in *bam* and *bgcn* mutants, and primary spermatocytes in *can* and *sa* mutants. Scale bars represent 10 µm. Both Aub and Ago3 staining exhibited perinuclear foci in undifferentiated germline cells (from apex to distal part in *bam* and *bgcn* mutant testes and at the apex of *can* and *sa* testes), and only Aub but not Ago3 was detected as perinuclear foci in the arrested primary spermatocytes of *can* and *sa* testes.

**Fig. S4.** Dynamic nature of transposon-mapping testicular piRNAs during spermatogenesis. (A) Normalized number of piRNAs mapping to the loci annotated as transposons on genome (flybase annotation). Testes enriched with spermatogonia (*bam* and *bgcn*) harbor more transposon-mapping piRNAs. (B) Pairwise comparison of transposon-mapping piRNAs from *bam*, *bgcn*, *can*, *sa* and *y w* samples with two different normalization, RLE and Rfam. P-values obtained by Kolmogorov-Smirnoff test revealed that *bam* and *bgcn* transposon mapping piRNAs showed maximum similarity. Transposon-mapping piRNAs from *can* and *sa* samples are closest among all comparisons. (C) Percentage of sense (S; in green) and antisense (AS; in red) transposon-mapping piRNAs (normalized). No significant change in overall sense/antisense ratios was observed among analyzed different testicular libraries. (D) Heat-map representing the percentage of sense (S) and antisense (AS) reads for transposon-mapping piRNAs in each library. Red represents 100% of AS reads, yellow represents 50% of S and 50% of AS, and green represents 100% of S. No significant change in sense/antisense ratios was observed for a specific transposon family among samples. (E) Normalized numbers of piRNAs mapping to representative transposons in all libraries. The Top panel shows piRNAs mapping to transposons which are more in spermatogonia samples (*bam* and *bgcn*), the bottom one shows those which are more in primary spermatocyte libraries (*can* and *sa*).

**Fig. S5.** Dynamic nature of cluster-mapping testicular piRNAs during spermatogenesis.(A) Percent contribution of piRNAs from *42AB* cluster among top fifteen piRNA clusters. Ovarian piRNAs from various heterozygous females of piRNA pathway components (*tap*, *tej*, *aub*, *armi*, *flam*, *krimp*, *piwi*, *spnE*, *squ*, *vas* and *zuc*), and piRNAs in testes enriched with spermatogonia (*bam* and *bgcn*) or primary spermatocyte (*can* and *sa*), and *y w* testes were analyzed. (B) Heat-map representing the expression level of the abundant cluster-mapping piRNAsin *bam, bgcn, can, sa* and *y w* testis libraries (log2 of normalized piRNA reads; minimum in yellow, maximum in green). Most of the cluster-mapping piRNAs were enriched in *bam* and *bgcn* libraries while some others show different trends. (C, D) Percentage of sense (S; in green) and antisense (AS; in red) of *Su(Ste)* (C) and *AT-chX* (D) piRNAs in each testicular library. The vast majority of *Su(Ste)* and *AT-chX* piRNAs were in antisense orientation, while only a very small amount of these were in sense orientation.

**Fig. S6.**  Density plots showing normalized number of 23-29-nt reads mapping to plus and minus strands of the two clusters at 38C (2L:2010400:20120000, and 20148259-20227581). Pie charts on the top compares the abundance of the transposons on the plus and minus strands. The transposon regions are represented as shaded area.

**Fig. S7.** Ping-pong amplification loop is more robust in the spermatogonia but can also be detected in primary spermatocytes. (A) Box plot showing overall ping-pong z-score for piRNAs mapping to 79 transposon families in *bam* and *bgcn* samples representing the spermatogonia and *can* and *sa* samples representing the primary spermatocytes. The transposon-mapping piRNAs in *bam* and *bgcn* have higher z-scores compared to those in *can* and *sa* samples. (B) Heatmap showing ping-pong z-scores for piRNA against selected each transpsoson family. Many transposon families contain higher ping-pong z-score in the spermatogonia samples compared to primary spermatocyte samples. (C-F) Bar plots showing the normalized number of transposon-mapping piRNAs without ping-pong (black bars) and those with ping-pong signature (grey bars) in *y w*, *bam*, *bgcn*, *can* and *sa* testes for *roo* (C), *baggins* (D), *Doc* (E) and *opus* (F), respectively. The pie charts represent the percentage of transposon-mapping piRNAs with ping-pong signature (grey) and those without ping-pong signature (black) in the total population of transposon-mapping piRNAs.

**Fig. S8.** Transposon-mapping, *Su(Ste)* and *AT-chX* piRNAs are severely reduced in *aub* mutant testes, and to lesser extent, in *ago3* mutant testes. (A) The normalized number of sense (S; in green) and antisense (AS; in red) 23 to 29-nt transposon-mapping reads in the indicated libraries. In *aub* mutant testes, transposon-mapping piRNAs were severely reduced. The reduction in *ago3* mutant testes was not as severe. (B) Heat-map representing the expression level of transposon-mapping piRNAs in each library. White represents the least expressed transposon-mapping piRNAs, and red represents the most expressed transposon-mapping piRNAs. *aub* loss causes severe reduction in piRNAs mapping to all transposon families, while *ago3* loss did not cause as severe defects. (C, D) The normalized number of sense (S; in green) and antisense (AS; in red) 23 to 29-nt *Su(Ste)*-mapping reads (C) and *AT-chX*-mapping reads (D). Although both piRNAs are severely reduced in *aub* and *ago3* mutant testes, the reduction of those piRNA is slightly milder in *ago3*. (E) Heatmap representing ping-pong z-scores for piRNAs mapping to selected transpsoson families in the controls and *ago3* mutant testes.

**SUPPLEMENTARY REFERENCES**

1. Love, M.I., Huber, W. and Anders, S. (2014) Moderated estimation of fold change and dispersion for RNA-seq data with DESeq2. *Genome Biol*, **15**, 550.

2. Burge, S.W., Daub, J., Eberhardt, R., Tate, J., Barquist, L., Nawrocki, E.P., Eddy, S.R., Gardner, P.P. and Bateman, A. (2013) Rfam 11.0: 10 years of RNA families. *Nucleic Acids Res*, **41**, D226-232.

3. Brennecke, J., Aravin, A.A., Stark, A., Dus, M., Kellis, M., Sachidanandam, R. and Hannon, G.J. (2007) Discrete small RNA-generating loci as master regulators of transposon activity in Drosophila. *Cell*, **128**, 1089-1103.
