# Supplementary material
Source: HighWire-hosted journal article supplement (doi:10.1101/rna.055996.116)
Supplement: Supplemental_Table_Legends.docx [file Supplemental_Table_Legends.docx]

**TABLES**

**Table S1.** Normalization strategy in *bam*, *bgcn*, *can*, *sa* and *y w* libraries and size profile.

**Table S2.** Transposon-mapping piRNAs in *bam*, *bgcn*, *can*, *sa* and *y w* libraries.

**Table S3.** Cluster-mapping piRNAs in *bam*, *bgcn*, *can*, *sa* and *y w* libraries.

**Table S4.** Normalization strategy and transposon-mapping piRNAs in *aub*, *ago3* heterozygous and mutant libraries.

**Table S5.** Primers used in the current study.
