# Supplementary material
Source: HighWire-hosted journal article supplement (doi:10.1101/rna.055996.116)
Supplement: Supplemental_TableS1.xlsx [file Supplemental_TableS1.xlsx]

## Sheet: Normalization factors
Sequence overview	bam	bgcn	can	sa	y w
total number of sequences	134867635	118583704	133286925	53436317	94760144
total number of genome maping reads (Uextra and 30 nt filtered)	8729403	8228945	10374056	4102569	6472237
% of genome mapping reads	6.47257	6.93936	7.78325	7.67749	6.83013
Normalization factors	bam	bgcn	can	sa	y w
Seq depth	1.16003	1.36651	2.64749	0.828279	1.10963
RLE	1.06832	1.16515	1.40763	0.772674	0.734943
Rfam	1.28384	1.51758	2.05382	1	3.23659
Non-normalized data	aub/CyO	aub	ago3/TM6	ago3
total number of sequences	69533021	61731683	52285071	55757529
total number of genome maping reads (Uextra and 30 nt filtered)	2832954	2405196	815459	1203531
Normalization Factors	aub/CyO	aub	ago3/TM6	ago3
RLE	1.10419	0.904247	0.811637	1.23978
miRNAs	1.08595	1	0.823251	1

## Sheet: Normalization test
Non-normalized data	bam	bgcn	can	sa	y w			Normalization factors	bam	bgcn	can	sa	y w
23-29 nt transposon-mapping reads	438417	579800	519301	262578	356528			Seq depth	1.16003	1.36651	2.64749	0.828279	1.10963
23-29 nt Su(Ste)-mapping reads	22511	56377	389505	210327	232784			RLE	1.06832	1.16515	1.40763	0.772674	0.734943
23-29 nt AT-chX-mapping reads	13619	42409	208410	123177	100057			Rfam	1.28384	1.51758	2.05382	1	3.23659
Data normalized with seq depth	bam	bgcn	can	sa	y w
23-29 nt transposon-mapping reads	377937	424292	196149	317016	321303
23-29 nt Su(Ste)-mapping reads	19405.6	41256.2	147123	253932	209785
23-29 nt AT-chX-mapping reads	11740.3	31034.5	78720	148714	90171.3
Data normalized with RLE	bam	bgcn	can	sa	y w
23-29 nt transposon-mapping reads	410380	497618	368920	339830	485110
23-29 nt Su(Ste)-mapping reads	21071.4	48386	276710	272207	316738
23-29 nt AT-chX-mapping reads	12748.1	36397.9	148058	159416	136143
Data normalized with Rfam	bam	bgcn	can	sa	y w
23-29 nt transposon-mapping reads	341490	382055	252847	262578	110155
23-29 nt Su(Ste)-mapping reads	17534.2	37149.2	189649	210327	71922.6
23-29 nt AT-chX-mapping reads	10608	27945.1	101474	123177	30914.3
Non-normalized data		aub/CyO	aub	ago3/TM6	ago3
23-29 nt transposon-mapping reads		84353	8517	103200	33240
23-29 nt Su(Ste)-mapping reads		74847	1293	128492	18420
23-29 nt AT-chX-mapping reads		18245	111	45098	3623
Data normalized with RLE		aub/CyO	aub	ago3/TM6	ago3
23-29 nt transposon-mapping reads	RLE	76393.6	9418.89	127150	26811.3
23-29 nt Su(Ste)-mapping reads	RLE	67784.6	1429.92	158312	14857.5
23-29 nt AT-chX-mapping reads	RLE	16523.4	122.754	55564.2	2922.3
Data normalized with RLE miRNAs		aub/CyO	aub	ago3/TM6	ago3
23-29 nt transposon-mapping reads	miRNA	77677	8517	125357	33240
23-29 nt Su(Ste)-mapping reads	miRNA	68923.4	1293	156079	18420
23-29 nt AT-chX-mapping reads	miRNA	16801	111	54780.4	3623

## Sheet: Size profile
	bam	bgcn	can	sa	y w
Normalization factors (RLE)	1.06832	1.16515	1.40763	0.772674	0.734943
									Normalized data
length (in nt)	bam	bgcn	can	sa	y w			length (in nt)	bam	bgcn	can	sa	y w
21	16521	16213	50060	19269	16961			21	15464.5	13914.9	35563.4	24938.1	23078
22	15340	13284	17255	9995	9253			22	14359	11401.1	12258.2	12935.6	12590.1
23	19308	18976	17519	11535	12176			23	18073.2	16286.3	12445.8	14928.7	16567.3
24	29150	31790	29955	20069	22521			24	27285.8	27284	21280.5	25973.4	30643.2
25	40476	42736	39781	24528	30669			25	37887.5	36678.5	28261	31744.3	41729.8
26	44120	43812	36664	23771	30840			26	41298.5	37602	26046.7	30764.6	41962.4
27	38043	37541	27845	18584	25311			27	35610.1	32219.9	19781.5	24051.5	34439.4
28	30453	27269	17409	12606	16887			28	28505.5	23403.8	12367.6	16314.8	22977.3
29	25223	20022	10738	8173	11447			29	23610	17184.1	7628.44	10577.6	15575.4
