# Supplementary material
Source: HighWire-hosted journal article supplement (doi:10.1101/rna.055996.116)
Supplement: Supplemental_TableS2.xlsx [file Supplemental_TableS2.xlsx]

## Sheet: all-mapping-reads
Tranposons	bam	bgcn	can	sa	y w
Idefix	6727.39	11127.3	2198.03	2600.06	4111.88
17.6	11819.5	4818.26	2288.96	2926.2	4505.11
1731	4913.32	3522.29	4832.25	1603.52	4250.67
297	8277.48	8674.42	2181.69	1344.68	3465.58
3S18	4474.32	126.164	1342.69	166.953	1493.99
412	4101.77	6392.31	2325.9	3116.45	4261.56
aurora-element	1219.67	3794.36	19186.9	8737.19	9961.32
Bari1	13060.7	5695.4	988.188	390.85	5246.67
BS	933.241	2725.83	750.909	1752.36	1753.88
Burdock	65.5235	107.282	184.708	15.5305	182.327
copia	13178.6	22943.8	11356	13628	20475.1
Doc	26860.9	16851	12717.1	11426.6	13558.9
F-element	14474.1	12516	5948.31	12791.9	14450.1
FB	41.1862	49.779	72.4624	530.625	88.4422
G-element	986.596	1879.59	2451.64	2303.69	5385.45
gypsy	1209.38	1182.68	591.776	1228.2	631.342
hobo	2223.12	1415.27	1103.28	3310.58	357.851
HeT-A	152.576	908.037	238.7	125.538	379.621
I-element	694.549	194.825	36.9416	53.0625	468.064
jockey	248.053	397.374	198.206	2710.07	340.162
hopper	538.228	442.003	138.531	393.439	303.425
mdg1	6040.33	5478.26	1547.29	3358.47	3617.97
mdg3	14191.4	18601.9	4121.83	6210.9	6039.93
micropia	8010.71	7825.6	2799.04	5867.93	9206.16
pogo	2224.05	3481.1	2397.65	234.251	734.751
R1A1-element	3231.24	7797.28	13989.5	12319.6	16223
R2-element	18.721	34.3303	18.4708	68.593	8.1639
S-element	1250.56	2137.92	1194.21	516.388	428.605
springer	1013.74	631.678	608.116	1348.56	710.259
TART-C	42.1222	2557.61	1658.82	634.161	757.882
TART-A	1356.34	5305.75	2139.77	1761.42	2054.58
TART-B	97.3491	994.722	753.041	408.969	409.556
Tirant	17.7849	12.0156	78.1457	139.774	66.6718
flea	9244.42	7955.2	2121.3	3968.04	3358.08
opus	4721.43	10666.4	24186.1	26649	39962.3
roo	20440.5	21609.2	18095	13199.6	15872
blood	2794.11	5466.25	2889.97	2363.22	1504.88
ZAM	346.338	502.081	104.431	663.928	400.031
GATE	11607.9	17421.8	7464.34	5742.4	10541
X-element	3936.09	9966.96	3413.55	4951.63	6234.5
Transpac	74.8839	15.4487	28.4166	63.4161	48.9834
Circe	6501.8	5519.46	1510.34	2690.66	3868.33
Rt1a	1749.48	1235.89	606.695	1008.19	854.488
Rt1b	5467.46	1752.56	3473.93	3758.38	4211.21
Quasimodo	7435.98	4735.87	3558.47	3616.01	4188.08
HMS-Beagle	11327.1	7611.04	1303.61	854.176	2932.2
diver	6177.93	8342.27	1386.02	2451.23	3106.36
Tabor	2157.59	5197.61	390.018	2561.24	1160.63
Stalker	5982.29	8142.3	1960.04	2989.62	4751.39
INE-1	2276.47	913.187	252.908	112.596	299.343
gtwin	4196.31	2067.54	326.081	3305.4	3954.05
gypsy2	1878.65	1919.92	430.512	1639.76	952.455
accord	4063.39	2626.27	740.253	1481.87	2404.27
1360	21979.4	39398.4	64637.2	28198.2	65056.8
gypsy3	1228.1	2804.79	410.62	2031.9	393.228
invader1	6217.24	9270.91	2976.64	2411.11	4198.97
invader2	8747.38	10457.9	3216.05	5145.77	5480.7
invader3	5784.78	10567.7	5337.35	6108.66	16355
G2	3908.94	5673.95	10654.8	4322.65	12338.4
Cr1a	11313.1	8210.1	2033.92	1832.6	3913.23
Doc2-element	4201.93	5202.76	1079.12	1360.21	2343.04
Doc3-element	3887.41	1744.84	974.69	1153.14	2627.42
Ivk	2108.92	875.424	713.968	396.027	1182.4
gypsy4	5003.18	2533.58	1307.16	2948.2	3194.81
invader4	5122.06	7122.69	1367.55	1672.12	1983.83
baggins	6001.01	11121.3	24461.7	31708.1	37841
G3	66.4595	59.2198	32.6791	34.9436	28.5736
transib1	13.1047	95.2667	7.10416	7.76524	13.6065
transib2	3598.17	7199.93	3065.44	1669.53	5574.58
gypsy5	1604.39	2428.01	118.639	283.431	753.8
gypsy6	1712.03	2204.87	841.842	1430.1	1235.47
diver2	3452.15	5074.02	7738.56	10470.1	8357.11
Dm88	8870.94	12261.1	2597.28	3938.27	5121.49
Juan	189.082	31.7556	431.933	332.611	55.7866
rover	1570.69	2195.43	188.26	330.023	846.324
G5	130.111	220.572	112.956	154.011	315.671
G4	150.704	308.115	61.8062	67.2987	202.737
rooA	1474.28	736.386	652.162	455.561	2092.68
jockey2	52.4188	160.494	159.133	745.463	235.392
G6	1496.74	9797.88	1590.62	458.149	4465.65
accord2	248.989	333.004	80.9874	53.0625	248.999
McClintock	1204.7	309.831	360.181	564.274	473.506
Stalker4	5602.26	7965.5	2074.41	3005.15	4845.27
hopper2	1010.93	1390.38	813.426	1299.38	994.635
Stalker2	3027.18	6044.71	5897.87	4221.7	8758.5
Stalker3T	127.303	170.793	97.3269	213.544	141.508
Max-element	4370.41	2403.98	1440.72	1633.29	2336.24
BS3	297.664	287.517	179.735	130.715	263.966
Porto1	528.868	1147.49	113.666	89.3003	352.408
Tc1-2	164.745	441.145	83.829	298.962	302.064
G5A	307.96	164.786	67.4895	9.05945	172.803
gypsy10	673.019	1275.37	443.299	905.945	1123.9
gypsy12	3958.55	10950.5	3903.02	2104.38	4713.29
invader6	5642.51	6845.47	2099.28	3520.24	3182.56
Dsim-ninja	1997.53	6702.14	34856.5	19180.1	21139.1
Helena	337.914	607.647	152.739	270.489	323.835
HMS-Beagle2	4122.36	6504.74	1170.76	3965.45	1908.99
Q-element	719.822	605.93	142.794	111.302	266.687
Dyak-TART	32.7617	1152.64	1356.18	508.623	684.407
TAHRE	62.7153	341.587	100.879	47.8856	93.8848

## Sheet: antisense-reads
	bam	bgcn	can	sa	y w
Idefix	4708.68	9064.93	1727.09	1960.72	3119.97
17.6	8003.31	2585.93	1640.47	1713.53	3631.57
1731	2490.33	1881.3	553.59	371.437	981.029
297	5630.09	6532.21	1494.29	1014.66	3216.58
3S18	944.64	22.3147	115.049	33.6494	220.425
412	3853.09	6028.41	2005.92	2977.97	3928.2
element	271.003	1453.03	816.174	2583.24	1356.57
Bari1	12786.5	5169.29	912.95	372.732	5151.42
BS	398.762	1602.37	620.59	1528.46	1239.55
Burdock	22.261	21.4565	102.868	11.6479	99.3274
copia	5108.41	11989	5174.51	3744.14	4579.95
Doc	20784	11373.6	8366.12	7514.16	9184.39
element	10227.5	8248.72	3542.84	10809.2	11879.8
FB	12.5823	13.7321	31.131	190.248	39.4588
element	668.797	1286.53	1746.04	1367.98	3755.39
gypsy	1011.42	1173.24	532.611	1039.25	545.621
hobo	1176.93	657.426	652.398	2691.95	161.917
HeT-A	82.2689	369.909	142.797	99.6539	235.392
element	217.771	56.6451	16.919	27.1783	304.786
jockey	109.369	259.194	113.696	1833.89	221.786
hopper	307.782	242.029	66.3226	306.727	190.491
mdg1	4729.01	4564.22	900.092	2979.26	2812.46
mdg3	8260.76	9304.38	1771.08	3992.63	2998.87
micropia	5210.04	4783.07	1643.18	3899.44	6880.81
pogo	1773.14	2635.71	2205.56	106.125	532.014
R1A1-element	2378.05	5464.53	11974.6	10707	14734.5
R2-element	807.203	1762	1092.97	454.267	348.326
S-element	521.681	569.884	556.974	785.583	576.916
TART-C	30.9718	1989.44	1521.36	577.216	665.358
TART-A	1248.55	3496.54	1916.59	1562.11	1781.09
TART-B	77.4295	625.67	646.307	357.201	323.835
flea	5439.42	4170.28	1554.52	3177.28	2721.3
opus	2533.88	7654.81	17884.1	20722.8	24823.7
roo	15535.3	18159.9	15592.6	10787.2	13282.7
blood	2430.32	5144.4	2673.88	1861.07	1364.73
ZAM	341.658	494.357	96.1	394.733	364.654
GATE	7929.75	10378.1	5603.58	4013.33	8030.56
element	2204.81	6175.17	2787.58	4067.69	4239.79
Circe	3250.1	2350.77	730.225	1267.03	2287.25
Rt1a	683.315	473.759	364.097	384.379	469.424
Rt1b	2164.16	744.11	2271.21	2204.03	2504.96
Quasimodo	5024.21	3354.93	3026.47	3005.15	3234.27
Beagle	5774.31	2924.09	736.316	553.92	2094.04
diver	2901.67	3692.23	768.8	1107.84	1360.65
Tabor	2211.58	5158.13	332.966	2539.23	1134.78
Stalker	5422.97	7280.61	1754.16	2820.08	4560.9
INE-1	1114.02	409.389	119.787	50.4741	161.917
gtwin	3712.75	2051.24	300.482	3275.64	3875.13
gypsy2	1745.07	1865	387.784	1608.7	865.373
accord	1816.69	895.164	98.8071	694.989	1074.91
1360	7182.56	11445.7	5690.21	5127.65	6763.79
gypsy3	1145.96	2695.79	377.633	1958.13	194.573
invader1	2366.44	2006.61	386.43	562.98	756.521
invader2	4809.34	5274.86	1891.55	3930.51	2805.66
invader3	3978.91	7072.05	4409.1	4903.75	14489.6
G2	2864.89	3481.1	6997.03	3025.86	9151.73
Cr1a	5714.3	3452.77	1162.68	1009.48	1986.55
Doc2-element	2529.04	2664.03	613.145	839.94	993.274
Doc3-element	1807.98	796.464	520.429	622.513	1073.55
Ivk	1402.44	744.968	500.803	304.139	929.324
gypsy4	3308.18	1761.15	1022.59	2409.81	2604.28
invader4	3078.79	4405.44	579.984	1242.44	1329.36
baggins	3491.1	6591.43	21060.8	27558.8	32424.3
transib2	3223.97	6235.25	2800.44	1538.81	5184.08
gypsy5	1654.09	2424.58	106.928	270.489	745.636
gypsy6	1401.47	2011.76	764.74	1247.62	1020.49
diver2	957.222	589.624	403.349	436.148	938.848
Dm88	4941.94	5764.92	1036.8	2201.45	2281.81
Juan	133.566	29.1808	361.39	214.838	47.6227
rover	1094.66	1453.89	119.11	269.195	752.439
G5	87.1082	127.022	47.3733	32.3552	123.819
G4	93.8833	225.722	41.2824	49.1799	133.344
rooA	979.483	553.577	417.561	354.613	1132.06
jockey2	42.5862	114.148	26.3937	148.834	62.5899
G6	720.095	8363.73	1252.01	345.553	3813.9
accord2	146.148	173.368	41.9592	22.0015	112.934
McClintock	567.171	143.329	225.361	462.032	270.769
Stalker4	5114.22	6930.44	1871.24	2778.66	4649.34
hopper2	299.072	381.067	83.9184	235.546	243.556
Stalker2	2827.15	5077.46	5528.46	4046.98	8517.67
Stalker3T	117.112	162.211	87.9789	199.308	134.704
element	2329.66	1013.6	695.033	1075.49	1317.11
BS3	166.473	153.628	56.1712	72.4756	156.475
Porto1	314.557	726.087	80.5345	54.3567	248.999
Tc1-2	86.1403	233.446	54.1409	176.012	174.163
G5A	146.148	85.8258	30.4542	2.58841	89.8029
gypsy10	679.444	1259.92	397.935	837.352	1010.96
gypsy12	1648.28	3164.4	323.492	770.053	643.587
invader6	4050.53	4696.39	1415.11	2597.47	2171.6
ninja	775.263	3823.54	2497.92	7189.32	6442.68
Helena	182.927	248.037	63.6155	120.361	187.77
HMS-Beagle2	3234.62	5395.01	965.061	3794.61	1616.45
Q-element	660.087	427.413	123.847	100.948	235.392
TART	28.0682	1005.02	1243.21	454.267	617.735
TAHRE	34.8433	157.061	63.6155	37.532	57.1473
