# Supplementary material
Source: HighWire-hosted journal article supplement (doi:10.1101/rna.055996.116)
Supplement: Supplemental_TableS3.xlsx [file Supplemental_TableS3.xlsx]

## Sheet: Sheet1
cluster	bam	bgcn	can	sa	y w
2R:2144349-2386719	1668.98	3551.47	812.715	1094.9	1955.25
X:21392175-21431907	940.73	1489.08	1185.68	1141.49	1325.27
4:1258473-1348320	138.535	103.849	29.127	23.2957	47.6227
2L:20148259-20227581	2678.04	3776.34	2498.53	1282.56	2834.23
3L:23273964-23314199	76.756	54.0703	35.5208	29.7668	73.4751
U:4015849-4029971	6.55235	101.274	731.018	113.89	201.376
X:21505666-21684449	2333.57	3741.15	1327.06	2675.13	1692.65
X:21759393-21844063	177.849	456.594	576.147	540.978	1145.67
U:5766708-5772171	17.7849	59.2198	17.05	7.76524	9.52455
3LHet:1402377-1557939	109.518	108.999	34.0999	64.7103	88.4422
3LHet:2011004-2180268	297.664	148.479	118.639	56.9451	238.114
3LHet:238123-332969	331.361	321.847	51.8603	33.6494	217.704
3RHet:2033725-2108757	27.1454	37.7634	36.2312	6.47103	68.0325
U:964336-1041768	109.518	125.306	69.6207	270.489	710.259
U:3113117-3137249	212.483	714.071	2062.34	1223.03	2538.97
X:11089529-11095706	553.205	890.014	9.2354	121.655	258.523
3LHet:773130-897972	132.919	66.9442	29.127	33.6494	85.7209
2RHet:2803104-2898450	300.472	294.383	147.766	124.244	190.491
2L:22369381-22420241	145.088	235.163	110.825	124.244	205.458
3LHet:163582-206577	83.3084	29.1808	14.9187	2.58841	43.5408
3L:24086324-24137471	71.1397	34.3303	19.8916	11.6479	43.5408
3LHet:495578-629871	281.751	212.848	187.55	119.067	578.276
2L:20104660-20118503	1873.97	6026.69	1222.63	2724.31	3858.8
2R:102144-211665	280.815	440.287	83.829	73.7698	170.081
4:824220-865373	41.1862	12.8739	2.84166	1.29421	5.4426
3RHet:2308626-2372457	420.286	661.717	97.3269	86.7118	236.753
2L:22489509-22556902	100.157	166.502	534.233	56.9451	466.703
3L:23452699-23482444	57.099	52.3538	4.97291	3.88262	21.7704
2L:2499-11131	31.8257	62.6529	11.3666	15.5305	23.131
2LHet:156077-219342	438.071	199.116	60.3853	68.593	121.098
2RHet:1857003-1923881	96.4131	66.9442	21.3125	14.2363	76.1964
3RHet:1599833-1675840	64.5874	61.7946	39.7833	28.4725	102.049
2RHet:2177704-2248466	23.4012	11.1574	22.0229	29.7668	32.6556
2R:744684-782837	58.9711	36.0469	7.10416	3.88262	28.5736
3L:23964084-24046804	91.7328	78.1015	26.9958	22.0015	70.7538
2RHet:2982706-3050412	29.0175	10.2991	4.26249	1.29421	13.6065
3LHet:356904-406827	127.303	242.029	1057.1	533.213	763.325
X:22342541-22383561	21.5291	16.3069	4.97291	3.88262	8.1639
U:7209933-7212604	10.2965	37.7634	27.7062	68.593	107.491
2RHet:1415904-1491914	133.855	32.6138	14.2083	16.8247	66.6718
3L:19841657-19861753	73.9479	78.9598	18.4708	10.3537	12.2458
3RHet:1775508-1799907	86.1165	35.1886	13.4979	11.6479	57.1473
3RHet:617644-658939	110.454	71.2355	178.314	121.655	159.196
2L:22971156-22992887	21.5291	26.606	12.7875	6.47103	19.0491
U:2074759-2097753	61.7793	84.9676	17.7604	11.6479	17.6884
3RHet:533743-579880	74.8839	57.5033	38.3624	15.5305	115.655
U:2443444-2477706	61.7793	28.3225	17.7604	22.0015	21.7704
3L:23630899-23671051	130.111	101.274	21.3125	28.4725	35.3769
2R:1254615-1281908	36.5059	74.6685	9.94582	15.5305	34.0162
3LHet:992060-1090427	84.2444	106.424	86.6707	40.1204	117.016
3L:24467284-24502317	204.059	151.912	25.575	22.0015	28.5736
3RHet:11338-41264	10.2965	10.2991	12.7875	2.58841	14.9671
3RHet:107055-154719	100.157	74.6685	21.3125	27.1783	39.4588
U:5466328-5474996	7.48839	12.0156	7.10416	10.3537	35.3769
2L:22258713-22292510	118.878	78.1015	20.6021	22.0015	55.7866
3L:24352561-24388470	109.518	81.5346	24.1541	10.3537	74.8357
3RHet:889003-925442	131.983	107.282	29.127	22.0015	93.8848
3RHet:1388385-1472907	34.6338	60.9364	27.7062	20.7073	76.1964
3RHet:1195593-1225067	30.8896	28.3225	7.81457	2.58841	20.4097
2R:1220249-1225114	45.8664	6.86607	7.10416	1.29421	8.1639
3LHet:1875500-1903361	33.6978	11.1574	7.81457	9.05945	21.7704
2R:848779-887289	66.4595	34.3303	23.4437	22.0015	34.0162
U:335892-387279	27.1454	23.173	3.55208	5.17683	21.7704
3L:24224763-24257092	74.8839	50.6372	66.7791	28.4725	69.3931
U:69266-119959	246.181	78.1015	29.127	40.1204	87.0816
U:1965187-1982854	21.5291	15.4487	4.26249	6.47103	9.52455
2L:22420341-22452436	144.152	58.3616	14.9187	27.1783	29.9343
3RHet:1119639-1162411	58.0351	76.385	32.6791	22.0015	51.7047
3LHet:717136-744867	24.3373	83.2511	4.97291	1.29421	40.8195
2LHet:336057-367088	52.4188	48.0625	14.2083	25.8841	28.5736
3L:24171077-24199822	98.2852	36.9051	19.8916	18.1189	55.7866
2RHet:1684220-1712266	58.9711	71.2355	12.0771	9.05945	25.8523
3RHet:832070-864794	51.4827	45.4877	15.6291	3.88262	35.3769
2RHet:871178-915139	64.5874	63.5111	13.4979	19.4131	23.131
3L:24312078-24321880	59.9072	30.8973	2.13125	9.05945	21.7704
XHet:170080-204036	901.416	54.9285	15.6291	19.4131	35.3769
3RHet:2281391-2308526	117.006	66.0859	11.3666	7.76524	88.4422
3RHet:2178310-2199481	203.123	76.385	53.9916	78.9466	55.7866
2R:21139959-21146679	9.36049	32.6138	6.39374	7.76524	13.6065
U:1798246-1833539	35.5699	37.7634	4.26249	12.9421	8.1639
3LHet:2180368-2230834	103.901	158.778	33.3895	28.4725	134.704
3RHet:1099062-1119539	51.4827	12.0156	22.0229	10.3537	51.7047
U:4179317-4183670	83.3084	134.747	242.962	173.424	351.048
X:12664996-12666347	58.0351	37.7634	52.5708	7.76524	100.688
2R:410698-420947	26.2094	35.1886	43.3354	32.3552	44.9014
U:923516-964236	90.7968	123.589	61.0957	25.8841	34.0162
U:8795936-8797237	3.7442	2.57478	314.004	780.407	1382.42
U:3928119-3942902	17.7849	17.1652	3.55208	9.05945	8.1639
3LHet:660546-687580	111.39	36.9051	105.142	77.6524	63.9505
3LHet:1166304-1227110	22.4652	22.3147	26.2854	18.1189	47.6227
U:3411258-3430431	75.82	73.8102	3.55208	2.58841	43.5408
2RHet:507101-519742	19.657	12.8739	9.2354	6.47103	12.2458
2RHet:744001-759624	73.9479	36.0469	8.52499	2.58841	34.0162
2RHet:1599018-1643957	40.2501	60.9364	14.9187	5.17683	20.4097
3RHet:185301-208455	25.2733	12.0156	9.94582	19.4131	13.6065
3RHet:1029684-1067037	47.7385	36.9051	14.9187	143.657	35.3769
2R:516606-526404	56.163	30.039	9.2354	5.17683	23.131
2L:21544534-21575520	138.535	117.581	56.8332	53.0625	58.5079
2R:1039689-1048724	57.099	24.8895	6.39374	3.88262	16.3278
AJ009736-Idefix	6727.39	11127.3	2198.03	2600.06	4111.88
X01472-17.6	11819.5	4818.26	2288.96	2926.2	4505.11
X07656-1731	4913.32	3522.29	4832.25	1603.52	4250.67
X03431-297	8277.48	8674.42	2181.69	1344.68	3465.58
U23420-3S18	4474.32	126.164	1342.69	166.953	1493.99
