# Supplementary material
Source: HighWire-hosted journal article supplement (doi:10.1101/rna.055996.116)
Supplement: Supplemental_TableS4.xlsx [file Supplemental_TableS4.xlsx]

## Sheet: aub-ago3-piRNAs
	Antisense				Sense				total
	aub mut	aub het	ago3 mut	ago3 het	aub mut	aub het	ago3 mut	ago3 het	aub mut	aub het	ago3 mut	ago3 het
Idefix	586.667	637.273	72.881	818.732	1.11111	134.545	12.9566	288.964	587.778	771.818	85.8376	1107.7
17.6	121.111	393.636	29.1524	498.895	2.22222	150	24.2937	426.037	123.333	543.636	53.4461	924.932
1731	3.33333	91.8182	47.7776	170.415	16.6667	336.364	166.817	447.03	20	428.182	214.594	617.445
297	135.556	686.364	53.4461	675.485	21.1111	332.727	72.881	235.864	156.667	1019.09	126.327	911.348
3S18	1.11111	41.8182	10.5273	22.228	21.1111	159.091	119.039	163.005	22.2222	200.909	129.566	185.233
412	625.556	782.727	316.628	832.316	5.55556	29.0909	17.0056	77.798	631.111	811.818	333.633	910.114
aurora-element	6.66667	151.818	85.8376	513.714	3.33333	1940.91	328.774	1294.16	10	2092.73	414.612	1807.88
Bari1	5.55556	195.455	50.2069	1321.33	1.11111	30.9091	22.6741	27.1676	6.66667	226.364	72.881	1348.5
BS	3.33333	214.545	51.0167	580.398	2.22222	111.818	52.6363	111.14	5.55556	326.364	103.653	691.538
copia	112.222	992.727	261.562	1229.95	98.8889	2817.27	2686.07	5051.93	211.111	3810	2947.63	6281.88
Doc	45.5556	1043.64	240.507	2448.79	147.778	862.727	1002.52	1227.48	193.333	1906.36	1243.03	3676.27
F-element	110	583.636	292.334	3148.97	76.6667	738.182	1002.52	950.865	186.667	1321.82	1294.85	4099.83
G-element	7.77778	88.1818	109.322	1397.89	1.11111	159.091	242.127	388.99	8.88889	247.273	351.448	1786.89
gypsy	214.444	233.636	72.0712	167.945	1.11111	71.8182	4.04895	18.5233	215.556	305.455	76.1202	186.468
hobo	3.33333	73.6364	46.9678	427.272	3.33333	161.818	42.109	211.166	6.66667	235.455	89.0768	638.438
HeT-A	35.5556	38.1818	28.3426	40.7514	0	9.09091	14.5762	25.9327	35.5556	47.2727	42.9188	66.684
I-element	1.11111	30.9091	0.809789	24.6978	1.11111	63.6364	5.66852	85.2074	2.22222	94.5455	6.47831	109.905
jockey	4.44444	40.9091	28.3426	256.857	11.1111	40	51.8265	81.5027	15.5556	80.9091	80.1691	338.36
hopper	0	21.8182	4.04895	28.4025	0	19.0909	0.809789	65.4491	0	40.9091	4.85873	93.8516
mdg1	54.4444	136.364	344.97	975.563	45.5556	124.545	20.2447	186.468	100	260.909	365.215	1162.03
mdg3	25.5556	1260.91	29.9622	698.947	122.222	961.818	363.595	1024.96	147.778	2222.73	393.557	1723.91
micropia	10	432.727	103.653	633.498	73.3333	290.909	174.914	286.494	83.3333	723.636	278.567	919.993
pogo	1.11111	343.636	8.09789	379.111	1.11111	55.4545	7.2881	116.08	2.22222	399.091	15.386	495.191
R1A1-element	14.4444	2060	384.65	3689.85	102.222	670.909	248.605	398.869	116.667	2730.91	633.255	4088.72
S-element	3.33333	96.3636	41.2992	175.354	1.11111	15.4545	3.23916	25.9327	4.44444	111.818	44.5384	201.287
springer	286.667	300	80.9789	135.838	6.66667	20	34.0111	40.7514	293.333	320	114.99	176.589
TART-C	1.11111	40	10.5273	121.019	0	4.54545	0	12.3489	1.11111	44.5455	10.5273	133.368
TART-A	20	201.818	173.295	680.424	2.22222	43.6364	29.9622	83.9725	22.2222	245.455	203.257	764.397
TART-B	2.22222	39.0909	23.4839	108.67	0	4.54545	2.42937	23.4629	2.22222	43.6364	25.9132	132.133
flea	0	520	295.573	1212.66	10	220	188.681	186.468	10	740	484.254	1399.13
opus	134.444	4251.82	399.226	3651.57	404.444	3886.36	2014.76	3865.2	538.889	8138.18	2413.98	7516.77
roo	76.6667	3032.73	442.145	5107.5	88.8889	606.364	391.128	566.814	165.556	3639.09	833.273	5674.32
blood	375.556	528.182	220.263	623.619	8.88889	25.4545	17.8154	163.005	384.444	553.636	238.078	786.625
ZAM	63.3333	49.0909	29.9622	65.4491	2.22222	0.909091	0	6.17445	65.5556	50	29.9622	71.6236
GATE	22.2222	1059.09	335.253	1658.46	7.77778	313.636	285.856	815.027	30	1372.73	621.108	2473.48
X-element	5.55556	712.727	140.903	912.583	1.11111	377.273	204.877	280.32	6.66667	1090	345.78	1192.9
Circe	1.11111	169.091	144.952	351.944	2.22222	160.909	80.1691	471.728	3.33333	330	225.121	823.671
Rt1a	6.66667	58.1818	30.772	258.092	3.33333	39.0909	56.6852	127.194	10	97.2727	87.4572	385.286
Rt1b	7.77778	136.364	155.479	764.397	4.44444	104.545	213.784	440.856	12.2222	240.909	369.264	1205.25
Quasimodo	276.667	516.364	245.366	1128.69	4.44444	156.364	204.067	355.648	281.111	672.727	449.433	1484.34
HMS-Beagle	23.3333	240	101.224	465.553	23.3333	148.182	133.615	159.301	46.6667	388.182	234.839	624.854
diver	3.33333	217.273	3.23916	103.731	15.5556	200.909	9.71747	118.549	18.8889	418.182	12.9566	222.28
Tabor	254.444	222.727	328.774	540.882	2.22222	6.36364	4.04895	7.40934	256.667	229.091	332.823	548.291
Stalker	274.444	424.545	234.839	906.409	7.77778	45.4545	11.337	69.1538	282.222	470	246.176	975.563
INE-1	0	20.9091	2.42937	41.9862	8.88889	31.8182	17.0056	34.5769	8.88889	52.7273	19.4349	76.5631
gtwin	218.889	215.455	506.118	1152.15	38.8889	19.0909	47.7776	41.9862	257.778	234.545	553.896	1194.14
gypsy2	181.111	176.364	255.084	449.5	1.11111	6.36364	2.42937	17.2885	182.222	182.727	257.513	466.788
accord	6.66667	45.4545	6.47831	116.08	5.55556	74.5455	9.71747	151.891	12.2222	120	16.1958	267.971
1360	30	1365.45	755.533	2967.44	43.3333	11258.2	723.951	21357.4	73.3333	12623.6	1479.48	24324.9
gypsy3	212.222	214.545	230.79	458.144	2.22222	9.09091	8.09789	17.2885	214.444	223.636	238.888	475.432
invader1	12.2222	120	92.316	307.487	17.7778	500.909	145.762	891.59	30	620.909	238.078	1199.08
invader2	2.22222	290.909	47.7776	791.564	3.33333	313.636	81.7887	384.051	5.55556	604.545	129.566	1175.61
invader3	2.22222	966.364	40.4895	616.21	14.4444	321.818	102.843	364.292	16.6667	1288.18	143.333	980.502
G2	57.7778	1004.55	262.372	2053.62	2.22222	750.909	374.932	605.096	60	1755.45	637.304	2658.72
Cr1a	17.7778	336.364	120.659	361.823	4.44444	211.818	97.9845	506.305	22.2222	548.182	218.643	868.127
Doc2-element	13.3333	101.818	12.1468	284.025	1.11111	148.182	51.8265	254.387	14.4444	250	63.9733	538.412
Doc3-element	4.44444	80	7.2881	274.145	2.22222	135.455	119.849	347.004	6.66667	215.455	127.137	621.149
Ivk	3.33333	145.455	2.42937	177.824	6.66667	49.0909	0	34.5769	10	194.545	2.42937	212.401
gypsy4	561.111	612.727	340.921	1154.62	2.22222	82.7273	80.1691	204.992	563.333	695.455	421.09	1359.61
invader4	75.5556	171.818	51.0167	337.125	12.2222	118.182	110.941	311.192	87.7778	290	161.958	648.317
baggins	76.6667	2968.18	652.69	8315.75	10	1327.27	896.436	1134.86	86.6667	4295.45	1549.13	9450.61
transib2	0	445.455	53.4461	1447.29	0	91.8182	25.1035	85.2074	0	537.273	78.5495	1532.5
gypsy5	41.1111	40.9091	42.9188	79.0329	0	3.63636	3.23916	9.87912	41.1111	44.5455	46.158	88.912
gypsy6	300	272.727	149.001	372.937	1.11111	21.8182	32.3916	72.8585	301.111	294.545	181.393	445.795
diver2	1.11111	178.182	63.1635	145.717	6.66667	1111.82	118.229	1802.94	7.77778	1290	181.393	1948.66
Dm88	147.778	397.273	126.327	585.338	13.3333	405.455	206.496	663.136	161.111	802.727	332.823	1248.47
Juan	4.44444	45.4545	8.90768	83.9725	0	19.0909	7.2881	30.8722	4.44444	64.5455	16.1958	114.845
rover	101.111	84.5455	38.0601	88.912	14.4444	23.6364	0	16.0536	115.556	108.182	38.0601	104.966
rooA	11.1111	97.2727	11.337	260.562	3.33333	57.2727	37.2503	169.18	14.4444	154.545	48.5873	429.742
jockey2	25.5556	20	7.2881	41.9862	0	41.8182	114.99	245.743	25.5556	61.8182	122.278	287.729
G6	30	150.909	49.3971	513.714	2.22222	145.455	64.7831	130.898	32.2222	296.364	114.18	644.612
McClintock	2.22222	34.5455	43.7286	122.254	0	34.5455	1.61958	41.9862	2.22222	69.0909	45.3482	164.24
Stalker4	290	447.273	215.404	855.778	7.77778	42.7273	18.6251	50.6305	297.778	490	234.029	906.409
hopper2	0	90.9091	5.66852	65.4491	1.11111	134.545	12.9566	372.937	1.11111	225.455	18.6251	438.386
Stalker2	571.111	821.818	278.567	1941.25	2.22222	44.5455	14.5762	65.4491	573.333	866.364	293.144	2006.7
Stalker3T	48.8889	44.5455	12.9566	74.0934	0	0.909091	0	6.17445	48.8889	45.4545	12.9566	80.2678
Max-element	6.66667	163.636	98.7943	271.676	4.44444	146.364	149.811	235.864	11.1111	310	248.605	507.54
Tc1-2	1.11111	30.9091	0	27.1676	0	21.8182	0	27.1676	1.11111	52.7273	0	54.3351
gypsy10	297.778	287.273	98.7943	250.683	0	3.63636	12.9566	44.456	297.778	290.909	111.751	295.139
gypsy12	3.33333	99.0909	76.1202	158.066	2.22222	220.909	80.1691	822.436	5.55556	320	156.289	980.502
invader6	2.22222	438.182	65.5929	707.592	1.11111	497.273	76.1202	240.803	3.33333	935.455	141.713	948.395
Dsim-ninja	3.33333	572.727	219.453	2027.69	3.33333	3526.36	537.7	2522.88	6.66667	4099.09	757.153	4550.57
Helena	17.7778	25.4545	8.09789	67.9189	0	10.9091	14.5762	67.9189	17.7778	36.3636	22.6741	135.838
HMS-Beagle2	418.889	533.636	526.363	1131.16	4.44444	77.2727	40.4895	81.5027	423.333	610.909	566.852	1212.66
Q-element	0	33.6364	8.09789	44.456	0	6.36364	3.23916	16.0536	0	40	11.337	60.5096
Dyak-TART	1.11111	28.1818	18.6251	138.308	0	7.27273	0	13.5838	1.11111	35.4545	18.6251	151.891

## Sheet: Sheet2
aub-het-sense	aub-het-antisense	aub-het-all
134.545	637.273	771.818
150	393.636	543.636
336.364	91.8182	428.182
332.727	686.364	1019.09
159.091	41.8182	200.909
29.0909	782.727	811.818
1940.91	151.818	2092.73
30.9091	195.455	226.364
111.818	214.545	326.364
2817.27	992.727	3810
862.727	1043.64	1906.36
738.182	583.636	1321.82
26.3636	10	36.3636
159.091	88.1818	247.273
71.8182	233.636	305.455
161.818	73.6364	235.455
9.09091	38.1818	47.2727
63.6364	30.9091	94.5455
40	40.9091	80.9091
19.0909	21.8182	40.9091
124.545	136.364	260.909
961.818	1260.91	2222.73
290.909	432.727	723.636
55.4545	343.636	399.091
670.909	2060	2730.91
15.4545	96.3636	111.818
20	300	320
4.54545	40	44.5455
43.6364	201.818	245.455
4.54545	39.0909	43.6364
220	520	740
3886.36	4251.82	8138.18
606.364	3032.73	3639.09
25.4545	528.182	553.636
0.909091	49.0909	50
313.636	1059.09	1372.73
377.273	712.727	1090
15.4545	20.9091	36.3636
160.909	169.091	330
39.0909	58.1818	97.2727
104.545	136.364	240.909
156.364	516.364	672.727
148.182	240	388.182
200.909	217.273	418.182
6.36364	222.727	229.091
45.4545	424.545	470
31.8182	20.9091	52.7273
19.0909	215.455	234.545
6.36364	176.364	182.727
74.5455	45.4545	120
11258.2	1365.45	12623.6
9.09091	214.545	223.636
500.909	120	620.909
313.636	290.909	604.545
321.818	966.364	1288.18
750.909	1004.55	1755.45
211.818	336.364	548.182
148.182	101.818	250
135.455	80	215.455
49.0909	145.455	194.545
82.7273	612.727	695.455
118.182	171.818	290
1327.27	2968.18	4295.45
91.8182	445.455	537.273
3.63636	40.9091	44.5455
21.8182	272.727	294.545
1111.82	178.182	1290
405.455	397.273	802.727
19.0909	45.4545	64.5455
23.6364	84.5455	108.182
57.2727	97.2727	154.545
41.8182	20	61.8182
145.455	150.909	296.364
34.5455	34.5455	69.0909
42.7273	447.273	490
134.545	90.9091	225.455
44.5455	821.818	866.364
0.909091	44.5455	45.4545
146.364	163.636	310
21.8182	30.9091	52.7273
3.63636	287.273	290.909
220.909	99.0909	320
497.273	438.182	935.455
3526.36	572.727	4099.09
10.9091	25.4545	36.3636
77.2727	533.636	610.909
6.36364	33.6364	40
7.27273	28.1818	35.4545
38750	37643.6	76393.6
