# Supplementary material
Source: HighWire-hosted journal article supplement (doi:10.1101/rna.055996.116)
Supplement: Supplemental_TableS5.docx [file Supplemental_TableS5.docx]

**Table S5. List of primers used in the current study.**

| **Primer name** | **Primer sequence** |
| --- | --- |
| kl-5_fw | TTAAGCTCATGAGGATTGCAGA |
| kl-5_rv | ATAAGACGCTGTGTGTCTGCTG |
| kl_3_fw | TGGGAAAACCCCCTTATCTTAT |
| kl_3_rv | TACATTTCCACAAGCCACTTTG |
| ory_fw | ACGCTCCCTAAAGCAGTCAATA |
| ory_rv | TGACAGCTCTCCGATTTCACTA |
| 1360_fw | GGAGCTCTGCGTATAGCCAACTT |
| 1360_rv | ACCTAAACCGCCGAGTCCTG |
| mdg3_fw | CCCGTCTGTGTTCCAAAGAT |
| mdg3_rv | TGCCAATAGAATGTCGTCCA |
| act5C_fw | TGCCCATCTACGAGGGTTAT |
| act5C_rv | AGTACTTGCGCTCTGGCGG |
